# Mouse fertilization triggers a conserved transcription program in one-cell embryos

One Sentence Summary: Fertilization instates transcription in mouse and human one-cell embryos far sooner than thought and is programmed.

5 **Maki Asami<sup>1\*</sup>, Brian Y. H. Lam<sup>2\*</sup>, Martin Hoffmann<sup>3</sup>, Toru Suzuki<sup>1</sup>,  
Xin Lu<sup>4</sup>, Matthew D. Vermilyea<sup>5</sup>, Naoko Yoshida<sup>6</sup>, Marcella K. Ma<sup>2</sup>,  
Kara Rainbow<sup>2</sup>, Stefanie Braun<sup>5</sup>, Nina Patwary<sup>4</sup>, Giles S. H. Yeo<sup>2†</sup>,  
Christoph A. Klein<sup>3,4†</sup> & Anthony C. F. Perry<sup>1†</sup>**

<sup>1</sup>Laboratory of Mammalian Molecular Embryology, Department of Biology and  
10 Biochemistry, University of Bath, BA2 7AY, England. <sup>2</sup>Metabolic Research  
Laboratories, Wellcome Trust-MRC Institute of Metabolic Science, Addenbrooke's  
Hospital, University of Cambridge, CB2 0QQ, England. <sup>3</sup>Project Group Personalized  
Tumor Therapy, Fraunhofer Institute for Toxicology and Experimental Medicine  
ITEM, Regensburg, Germany. <sup>4</sup>Experimental Medicine and Therapy Research,  
15 University of Regensburg, Regensburg, Germany. <sup>5</sup>Ovation Fertility Austin,  
Embryology and Andrology Laboratories, Austin, TX 78731, USA. <sup>6</sup>Department of  
Stem Cell Pathology, Kansai Medical University, Osaka 573-1010, Japan.

\*These authors contributed equivalently to this work.

†Corresponding authors. Email: [gshy2@cam.ac.uk](mailto:gshy2@cam.ac.uk) (G.S.H.Y.),  
20 [christoph.klein@klinik.uni-regensburg.de](mailto:christoph.klein@klinik.uni-regensburg.de) (C.A.K.), [perry135@aol.com](mailto:perry135@aol.com)  
(A.C.F.P.).

Key words: one-cell embryo; fertilization; mouse; human; embryonic genome activation (EGA); gene expression; transcriptome; totipotency; RNA-seq

**Following fertilization, the new embryo reprograms parental genomes to**  
25 **begin transcription (embryonic genome activation, EGA). EGA is**  
**indispensable for development, but its dynamics, profile or when it initiates in**  
**vertebrates are unknown. We here characterize the onset of transcription in**  
**mouse one-cell embryos. Precise embryo staging eliminated noise to reveal**  
**a cascading program of *de novo* transcription initiating within six hours of**  
30 **fertilization. This immediate EGA (iEGA) utilized canonical promoters,**  
**produced spliced transcripts, was distinctive and predominantly driven by**  
**the maternal genome. Expression represented pathways not only associated**  
**with embryo development but with cancer. In human one-cell embryos,**  
**hundreds of genes were up-regulated days earlier than thought, with**  
35 **conservation to mouse iEGA. These findings provide a functional basis for**  
**epigenetic analysis in early-stage embryos and illuminate networks**  
**governing totipotency and other cell-fate transitions.**

It is not known precisely when mammalian EGA initiates after fertilization (1). To address  
40 this, we generated high-resolution transcriptome profiles by single-cell microarray and RNA-  
seq analyses of tightly-synchronous one-cell mouse embryos collected at 2 h intervals after  
fertilization. Embryo synchronization in this way minimized noise to reveal hitherto  
inaccessible information about gene expression at the onset of development. Embryos of  
different crosses (designated F2 and B6*cast*) developed efficiently *in vitro* (fig. S1A) and  
45 their transcriptomes exhibited time-point-dependent clustering (Fig. 1, A and B). Merged  
F2 and B6*cast* (F2-B6*cast*) RNA-seq series detected 3,989 differentially-expressed genes  
(DEGs) relative to mature metaphase II (mII) oocytes (FDR<0.05; Fig. 1C and fig. S1, B to  
D), including most (64.8%; *n*=667) DEGs and pathway trends shared by microarrays (fig.  
S1E). We subsequently focussed on F2-B6*cast* RNA-seq series.

50 Unsupervised cluster analysis of top F2-B6*cast* RNA-seq DEGs assigned each embryo to  
its correct relative position on the time-course (Fig. 1D). Of the 4,067 DEGs (FDR<0.05),  
2,290 (56.3%) were down-regulated (fig. S2A), including maternal transcripts (*eg Mos, Plat*  
and *Gdf9*) (2-4). However, DEGs also reflected up-regulation that had clearly initiated by 6  
h (Fig. 1D and fig. S1D). Genome activation within 12 h of fertilization (immediate EGA,  
55 iEGA) overlapped with EGA (3, 5, 6) but was distinctive (fig. S2), and genes responsive to  
the EGA regulator, *Dux*, were not up-regulated, further suggesting that EGA and iEGA are  
distinguishable (fig. S1F). Thus, mouse fertilization immediately triggers a signature  
program of gene expression, iEGA, in one-cell embryos.

EGA in non-mammalian vertebrates involves chromatin remodelling (1, 7, 8) leading us  
60 to monitor histone modifications (*n*=34) in mouse embryos and biparental mII oocytes  
containing both oocyte- and sperm-derived genomes (9, 10). Embryonic histone marks  
associated with gene activity increased in number by up to 2.5-fold compared to those in

biparental oocytes ( $p=0.006$ ; Fig. 1, E to H and fig. S3, A and B), suggesting that meiotic exit promotes active chromatin to enable iEGA.

65 Genes encoding detected iEGA transcripts were distributed uniformly throughout the genome (fig. S3C). Most were protein-coding, with annotated 5'-ends, implying that they mapped to canonical RNA polymerase II (Pol II) transcription start sites (fig. S3D), and some were refractory to the Pol II inhibitor,  $\alpha$ -amanitin (fig. S4, A and B) as previously noted (3). Upstream regulator analysis (INGENUITY, FDR<0.05) of iEGA genes identified  
70 transcription factors (TFs) that included c-Myc and additional (11) cancer-associated TFs (Fig. 2A and fig. S5A). This lead us to investigate whether c-Myc might play a role in iEGA. c-Myc protein was present in mII oocytes, where it localized to spindles (12), and remained detectable in one-cell embryos (fig. S5, B to D). Genes encoding c-Myc-regulatory SUMO pathway components (13) were activated following fertilization (fig. S5E), consistent with  
75 an early embryonic role for SUMO. Moreover, inhibiting c-Myc from the onset of iEGA after fertilization lead to marked one-cell developmental arrest and blocked activation of candidate c-Myc-regulated iEGA genes (Fig. 2, B and C and fig. S5F). These findings suggest that iEGA gene expression is able to predict TFs that initiate embryonic transcription, that c-Myc is involved in iEGA and that iEGA shares regulatory features with cancer.

80 Most (2759/2811, 98.2%) iEGA transcripts exhibited canonical splicing (Fig. 2, D and E, and fig. S1, C and G) and genes for core spliceosomal components and the mRNA capping enzyme, guanylyltransferase (*Rngtt*) were up-regulated by 6 h (Fig. 2F). iEGA transcripts were processed independently of polyadenylation (fig. S6, A and B) (4) and some corresponded to protein level increases (fig. S6C); transcript interference *via* a splice-  
85 blocking morpholino could reduce corresponding protein levels within 6 h, supporting a nascent transcript contribution (fig. S6D). Oocytes coinjected with sperm plus *mCherry*

cRNA expressed mCherry protein within 4 h whether or not the injected cRNA had been polyadenylated (Fig. 2G). Thus, iEGA is accompanied by translational competence.

The F2-B6*cast* time-course revealed a pathway succession fitting developmental  
90 processes (Fig. 3A and fig. S6E) (14, 15) and endogenous retrovirus (MuERV) *LTR*, *Pol* and  
*Gag* transcripts (16) were up-regulated at hundreds of loci from ~8 h (Fig. 3B), showing that  
*MuERV* gene activation is part of iEGA. To discriminate between parental genomes in  
iEGA, we analysed unmerged B6*cast* (*Mus musculus domesticus* x *M. m. castaneus*) series  
transcriptomes. Clustering analysis separated B6*cast* embryos along the time-course (fig.  
95 S7A) and permitted parent-specific expression assignment. Informative transcript changes  
predominantly reflected maternal mRNA degradation (in 2226/4413 cases;  $\log_{2}FC < 0$ ; Fig. 3,  
C and D) followed by maternal allelic gene expression ( $\log_{2}FC > 0$ ; Fig. 3C). We investigated  
whether sperm-borne mRNA was introduced during removal of the major sperm  
nucleoprotein, protamine following fertilization. In agreement with a previous  
100 approximation (9), 50% of transgene encoded fluorescent protamine was removed by ~30  
min (fig. S7, B to F). However, starting the B6*cast* time-course at 20 min did not detect  
significant ( $FDR < 0.1$ ) levels of sperm-borne mRNA (17). These findings argue against the  
delivery of a major cargo of sperm-borne mRNA into oocytes and that iEGA predominantly  
involves maternal gene expression.

105 We next asked whether regulatory epigenetic marks were present at iEGA genes. Only  
one iEGA gene contained a DNA methylation imprint (*Flt1*;  $p < 0.05$ ), but some iEGA  
promoters contained the repressive mark, H3K27me3, present at the same promoter in sperm  
(18) or mII oocytes (19), or the active one, H3K4me2 in sperm (20) ( $p < 0.05$ ; Fig. 3, E and  
F, and Table S1). Further data mining revealed 17,168 promoter regions associated with the  
110 active mark, H3K4me3 in the sperm genome ( $FDR < 0.05$ ) (21), of which 1,116 corresponded

to iEGA genes (62.8% of the total;  $n=1,777$ ;  $FDR<0.05$ ). Only 95 (5.3%) iEGA promoter regions were present in the set of promoters bivalently marked in mouse primordial germ cells ( $n=3,498$ ;  $FDR<0.05$ ) (22). Assuming that the marks are preserved in the germline (22), this indicates that iEGA occurs independently of bivalently-marked gamete promoters.

115 Human EGA is thought to initiate between four- and eight-cell stages (23-25), leading us to perform high-resolution single-cell RNA-seq of human mII oocytes ( $n=12$ ) from six donors aged 23-31, and one-cell embryos ( $n=12$ ) from four unrelated couples. Unsupervised clustering analysis respectively placed oocyte and embryo transcriptomes into discrete groups (Fig. 4, A to C, and fig. S7G). In agreement with mouse data, most DEGs in human  
120 one-cell embryos (1,121 out of 1,995) were down-regulated, with 874 up-regulated ( $FDR<0.05$ ;  $\logFC>0$ ) including orthologs of 132 (15%) mouse iEGA genes (Fig. 4, D and E). Human DEGs included 16 down- and 29 up-regulated *hERV* loci (Table S2). Predicted pathway terms (fig. S8) were shared with mouse (Fig. 4F) and included transcriptional networks regulated by MYC and MYCN (Fig. 4G and fig. S9). Transcripts for putative TF  
125 drivers of human cleavage-stage EGA (*eg DUX4*, *OCT4* and *LEUTX*) (24-27) were not up-regulated. Thus, mouse and human iEGA overlap, suggesting that iEGA is broadly conserved in mammals.

This work reports an iEGA program that anticipates key events during the establishment of embryonic totipotency and is predominantly maternally-driven (Fig. 3A) (14, 15, 28).  
130 Maternal genome predominance is possibly an evolutionary corollary of parthenogenetic developmental potential in some non-mammalian vertebrates (29), prevented in mammals by imprinting (30). The distinctive stereotypical nature of iEGA and its association with the extreme cell fate change, from gamete death to the establishment of totipotency (28), hint that it is archetypal: many potency changes may 'borrow' from it. It is therefore possible that

135 disease states (*eg* some cancers) involving cell fate changes arise due to ectopic expression of the iEGA program, and that iEGA is predictive of disease mechanisms. Unlocking iEGA in its natural embryonic context thus promises to open new doors to regulatory (*eg* epigenetic) processes that are required for embryogenesis but cause disease if they become dysregulated in adulthood.



140 **REFERENCES AND NOTES**

1. D. Jukam *et al.*, *Dev. Cell* **42**, 316-332 (2017).
2. Z. Alizadeh *et al.*, *Mol. Reprod. Dev.* **72**, 281-290 (2005).
3. T. Hamatani *et al.*, *Dev. Cell* **6**, 117-131 (2004).
4. G.L. Temeles, R.M. Schultz, *J. Reprod. Fertil.* **109**, 223-228 (1997).
- 145 5. K.I. Abe *et al.*, *Proc. Natl. Acad. Sci. USA* **115**, E6780-E6788 (2018).
6. F. Aoki *et al.*, *Dev. Biol.* **181**, 296-307 (1997).
7. S. Hontelez *et al.*, *Nat. Commun.* **6**, 10148 (2015).
8. N.L. Vastenhouw *et al.*, *Nature* **464**, 922-926 (2010).
9. A.C.F. Perry *et al.*, *Biol. Reprod.* **60**, 747-755 (1999).
- 150 10. N. Yoshida *et al.*, *Dev. Biol.* **301**, 464-477 (2007).
11. C.V. Dang, *Cell* **149**, 22-35 (2012).
12. N. Alexandrova *et al.*, *Mol. Cell Biol.* **15**, 5188-5195 (1995).
13. J.D. Kessler *et al.*, *Science* **335**, 348-353 (2012).
14. R. Yanagimachi. Mammalian fertilization. In *The Physiology of Reproduction*, 2nd edn (ed. E. Knobil and J. D. Neill), pp.189-317. New York: Raven Press (1994).
- 155 15. L. Zhou, J. Dean, *Trends Cell Biol.* **25**, 82-91 (2015).
16. H.M. Rowe, D. Trono, *Virology* **411**, 273-287 (2011).
17. D. Zhou *et al.*, *Dev. Cell* **50**, 5-6 (2019).
18. H. Zheng *et al.*, *Mol. Cell* **63**, 1066-1079 (2016).
- 160 19. A. Inoue *et al.*, *Nature* **547**, 419-424 (2017).
20. K. Siklenka *et al.*, *Science* **350**, aab2006 (2015).
21. S. Erkek *et al.*, *Nat. Struct Mol. Biol.* **20**, 868-875 (2013).
22. M. Sachs *et al.*, *Cell Rep.* **3**, 1777-1784 (2013).
23. P. Braude *et al.*, *Nature* **332**, 459-461 (1988).
- 165 24. L. Leng *et al.*, *Cell Stem Cell* **25**, 697-712 (2019).
25. Z. Xue *et al.*, *Nature* **500**, 593-597 (2013).
26. P.G. Hendrickson *et al.*, *Nat. Genet.* **49**, 925-934 (2017).
27. E.M. Jouhilahti *et al.*, *Development* **143**, 3459-3469 (2016).

28. M.L. Condic, *Stem Cells Dev.* **23**, 796-812 (2014).
- 170 29. P. Sarvella, *Nature* **243**, 171 (1973).
30. C.L. Markert, *Ann. N. Y. Acad. Sci.* **541**, 633-638 (1988).

**Acknowledgements:** We thank Animal Facility support staff, J. Whitney for human embryo curation and C. Tickle for comments during manuscript preparation. **Funding:** We acknowledge support to A.C.F.P. from the  
175 Medical Research Council, UK (G1000839, MR/N000080/1 and MR/N020294/1) and to C.A.K. from the Josef Steiner Foundation and ERC Grant 322602. **Author contributions:** A.C.F.P. conceived the core idea, and (with M.A.) molecular and imaging experiments, performed by M.A., M.D.V. and N.Y. Mouse embryology was by M.A, T.S. and A.C.F.P. Human embryo preparation was by M.D.V. and S.B. Single-cell whole transcriptome amplification was performed by N.P. (microarray) and B.L., K.R. and M.K.M. (RNA-seq).  
180 C.A.K. designed microarray analyses, performed and evaluated by M.H., X.L. and C.A.K. B.L. designed RNA-seq analyses, performed and evaluated by B.L., M.M. and G.S.H.Y. Data analysis was by M.A., B.L., G.S.H.Y. and A.C.F.P. A.C.F.P. wrote the manuscript. **Competing interests:** The authors declare no competing interests. **Data and materials availability:** All data are available in the main text or supplementary materials. Gene Expression Omnibus accession numbers for expression data are GSE64650 (microarray) and GSE157834  
185 (RNA-seq).

**Fig. 1. The dynamic transcriptome program of mouse one-cell embryos, 0-12**

**h.** (A) Map-plots showing differentially-expressed genes relative to metaphase II (mII) oocytes from microarray (upper) and RNA-seq. (B) MDS analysis of microarray (left) and t-SNE analysis of RNA-seq data. (C) Relationships of microarray and RNA-seq data across the 12 h time-course, comparing all detected transcripts (left) and differentially-expressed transcripts (diff.). (D) Heatmap showing one-cell embryo gene expression changes (FDR<0.05). (E) Schematic of microinjection with control or heat-inactivated (heated) sperm. (F) Vertically-paired fluorescence images showing DNA (blue, Hoechst 33258) and histone modifications in biparental oocytes (mII) or embryos of (E). Arrowheads indicate paternal chromatin. Scale bar, 20  $\mu$ m. (G) Quantification of images of (F) ( $5 < n < 9$  oocytes or embryos each) as indicated at mII (green) or in embryos (red) after 6 h. Values show s.e.m. and isoparental chromatin labelling differences (*t*-test,  $p < 0.05$ ). (H) Pie charts summarizing histone modifications after 6 h with (right) or without meiotic exit.

**Fig. 2. Transcript processing and translation immediately after fertilization.**

(A) Upstream transcription regulators inferred for each iEGA time-point (INGENUITY). (B) Hoffman micrographs of embryos produced by *in vitro* fertilization (IVF) and incubated in c-Myc inhibitor, 10058-F4 (0, 1 or 2  $\mu$ M) after six (upper row) or 24 h. Scale bar, 100  $\mu$ m. (C) Quantification of developmental rates (percentage of embryos surviving IVF) of embryos of (B) for  $n=3$  independent biological replicates. 2-cell, two-cell embryo (24 h after IVF); 4-cell, four-cell embryo (~48 h); eB, expanded blastocyst (~96 h). (D) Histogram plots of transcript levels determined by qPCR using intron-flanking primers for random-primed cDNA derived from metaphase II (mII) oocytes (open bars) and embryos 6 h after *in vitro* fertilization. Intron-exon primer pairs gave products for genomic DNA but not cDNA. (E) qPCR analysis with intra-exonic primers and primers flanking exon-exon junctions. (F) Spliceosome component and guanylyltransferase (*Rngtt*) transcript levels determined by qPCR in germinal vesicle (GV) oocytes, mII oocytes (0) and one-cell embryos at the times shown (h) after sperm injection. (G) Injection of *mCherry* cRNA (mCh, top left: orf, mCherry open reading frame; c, cytoplasmic polyadenylation element; t, mRNA cleavage/polyadenylation signal). Fluorescence

intensity quantification (lower left) at the times shown after injection of *mCherry*  
220 cRNA (0.6 ng/ $\mu$ l) polyadenylated *in vitro* (pA<sup>+</sup>) or not (pA<sup>-</sup>). Fluorescence  
micrographs show representative oocytes with corresponding bright field images  
(insets, upper left) and a non-injected control (neg, inset upper right). Bars, 100  
 $\mu$ m. Values in (C-G) are  $\pm$  s.e.m. Unpaired *t*-tests show *p*-values <0.05.

**Fig. 3. Mouse one-cell embryo transcriptome signature.** (A) iEGA pathway  
225 succession and embryonic events in the first 12 h. Pb<sub>1</sub>, first polar body; Pb<sub>2</sub>,  
second polar body; mII, all and tII, second meiotic prophase, metaphase,  
anaphase and telophase respectively. (B) Relative levels ( $\pm$ s.e.m.) of *MuERV*  
transcripts *LTR*, *Pol* and *Gag* (RNA-seq; FDR *p*-value  $\leq$ 0.05) at the times shown  
post-fertilization, from RNA-seq (upper) and qPCR of pools of embryos generated  
230 by IVF (*n*=6 pools/time-point). (C) Histograms showing transcript level changes  
compared to mII oocytes (0 h) for maternal (B6) and paternal (*cast*) alleles in the  
B6*cast* series (FDR *p*-value <0.05). (D) Percentages of genes (RNA-seq; FDR *p*-  
value  $\leq$ 0.05) from each parental genome at times indicated post-fertilization. (E)  
Venn diagrams (upper) of up-regulated iEGA genes in F2-B6*cast* (all) and B6*cast*  
235 paternal (pat) and maternal (mat) RNA-seq datasets, as they map to promoters  
marked with H3K27me3 in mII oocytes (18). Histograms for F2-B6*cast* data show  
cumulative up-regulated gene numbers and numbers up-regulated for the first  
time. (F) As per (E), showing overlaps with H3K4me2 promoter occupancy in  
sperm altered by exposure to transgene expression of the H3K4me demethylase,  
240 *Kdm1a* (20). (G) As per (E), showing overlaps with genes differentially expressed  
in two-cell embryos (2C) following fertilization by transgenic *Kdm1a* sperm (20).

**Fig. 4. Human embryonic transcription initiates at the one-cell stage.** (A) t-  
SNE analysis of RNA-seq data for human metaphase II (mII) oocytes (*n*=12) and  
one-cell embryos (*n*=12) from different donors. (B) Heatmap showing changes in  
245 transcript levels (FDR *p*-value <0.10) in human bipronuclear one-cell (1C, 2pn)  
embryos (*n*=12) and mII oocytes (mII) (*n*=12) of (A). (C) Histograms of qPCR for  
single human one-cell embryo (*n*=4 separate embryos each) transcripts up-  
regulated from RNA-seq. Different embryos were used than for (A). Values are  $\pm$   
s.e.m. and normalized against mII oocytes ( $\sim$ 1.0). (D) Venn Diagram showing up-

250 regulated gene overlap between human (FDR<5%, logFC>0) and mouse (full time-  
course FDR<5%, slope >0) one-cell embryos. **(E)** Histograms for transcript levels  
(qPCR) of mouse orthologs of transcripts up-regulated in human one-cell embryos.  
Values are  $\pm$  s.e.m., normalized against mII oocytes ( $\sim$ 1.0). *p*-values (unpaired *t*-  
test) are indicated for pair-wise comparisons. **(F)** Pathway analysis of up-regulated  
255 genes in human (H) and mouse one cell embryos. **(G)** Transcription regulators  
suggested for human (H) and mouse one-cell embryos indicated by INGENUITY  
analysis.

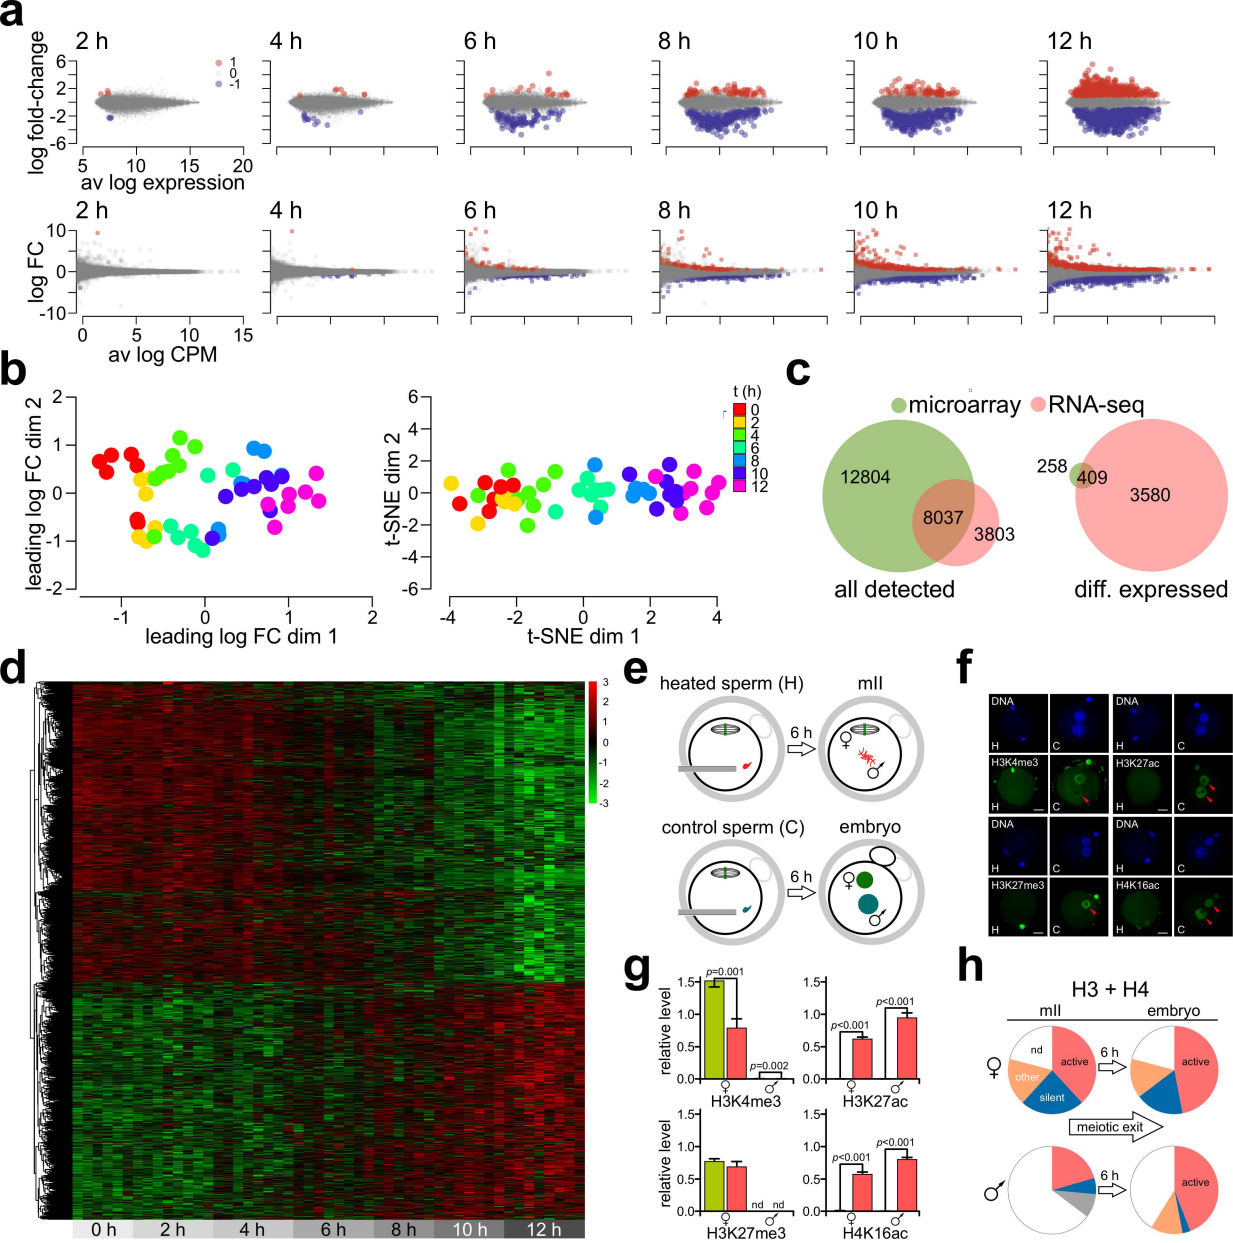

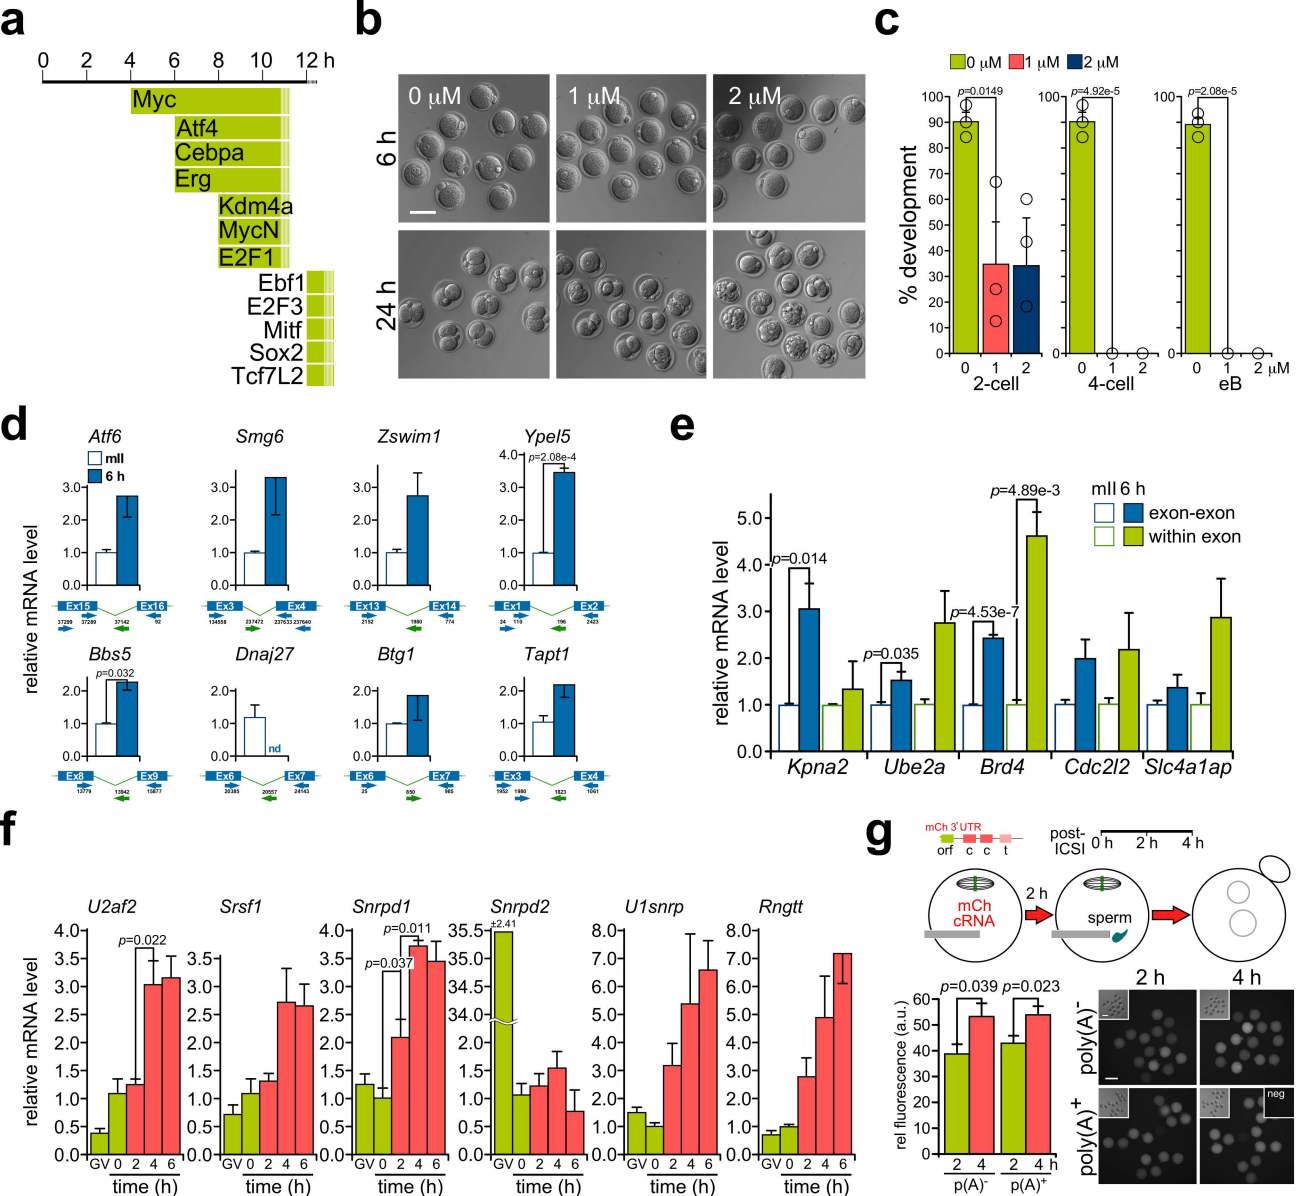

**Figure 2**  
**Asami et al.**

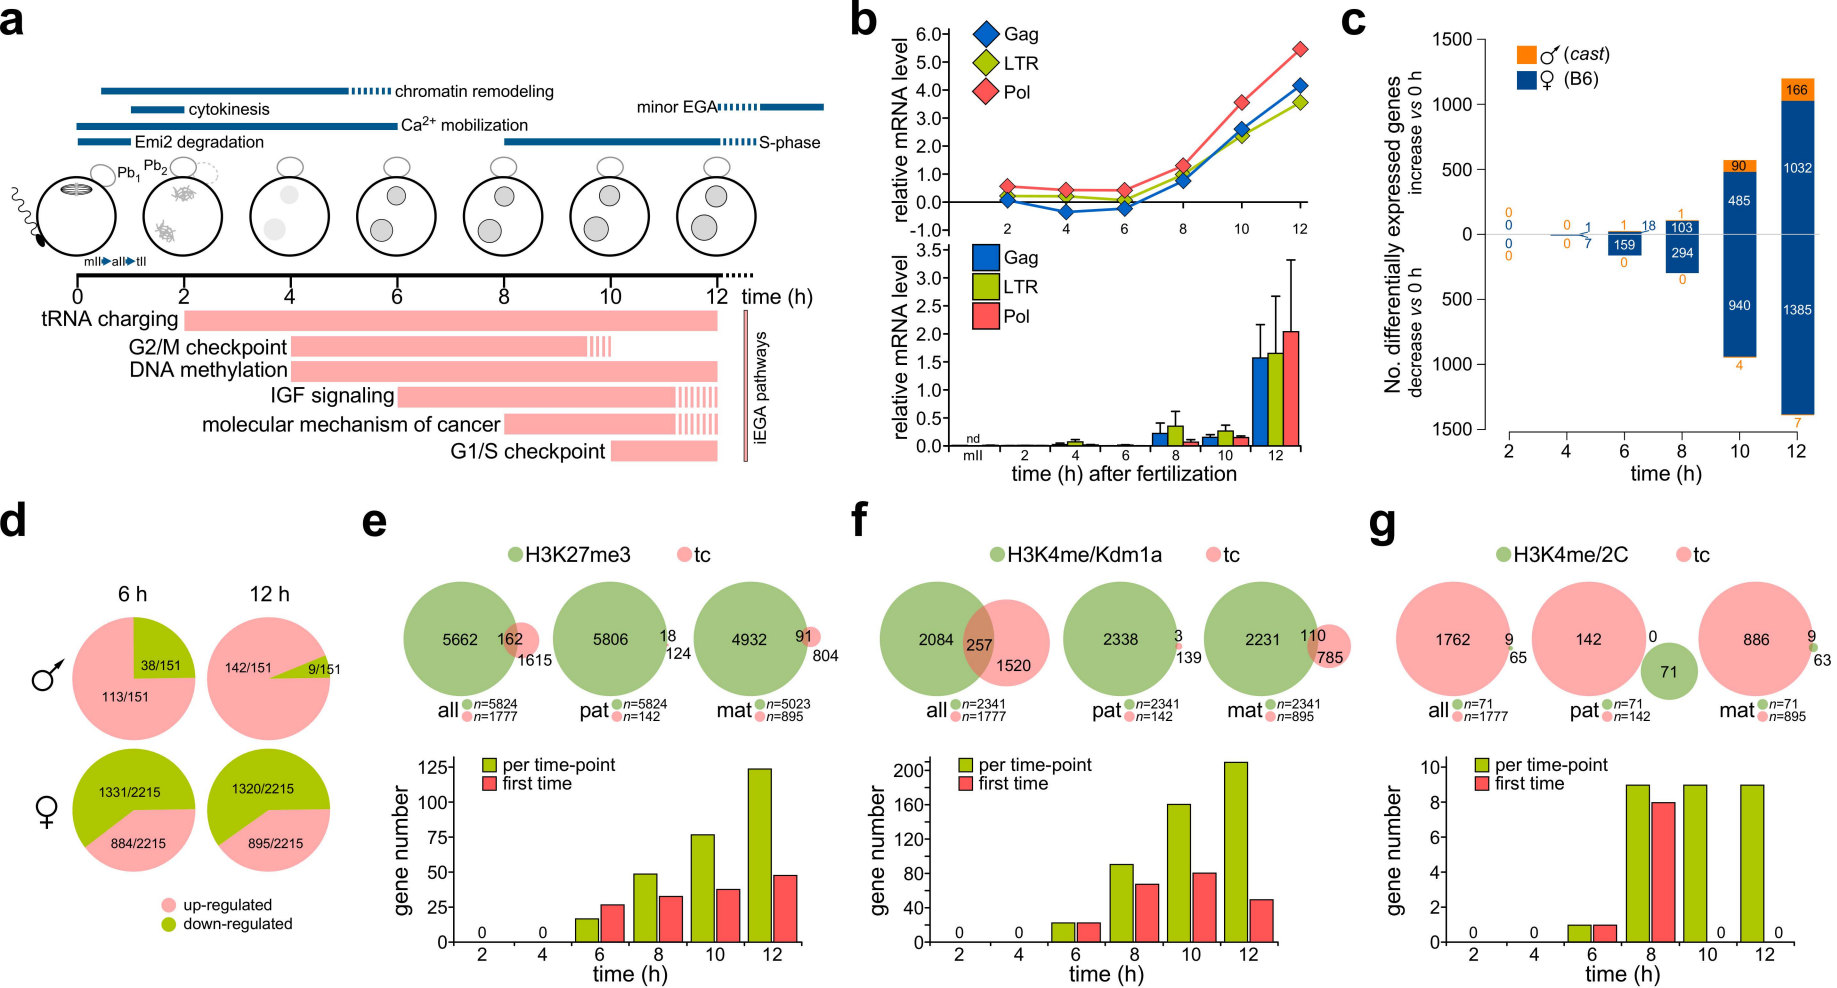

**Figure 3**  
**Asami et al.**



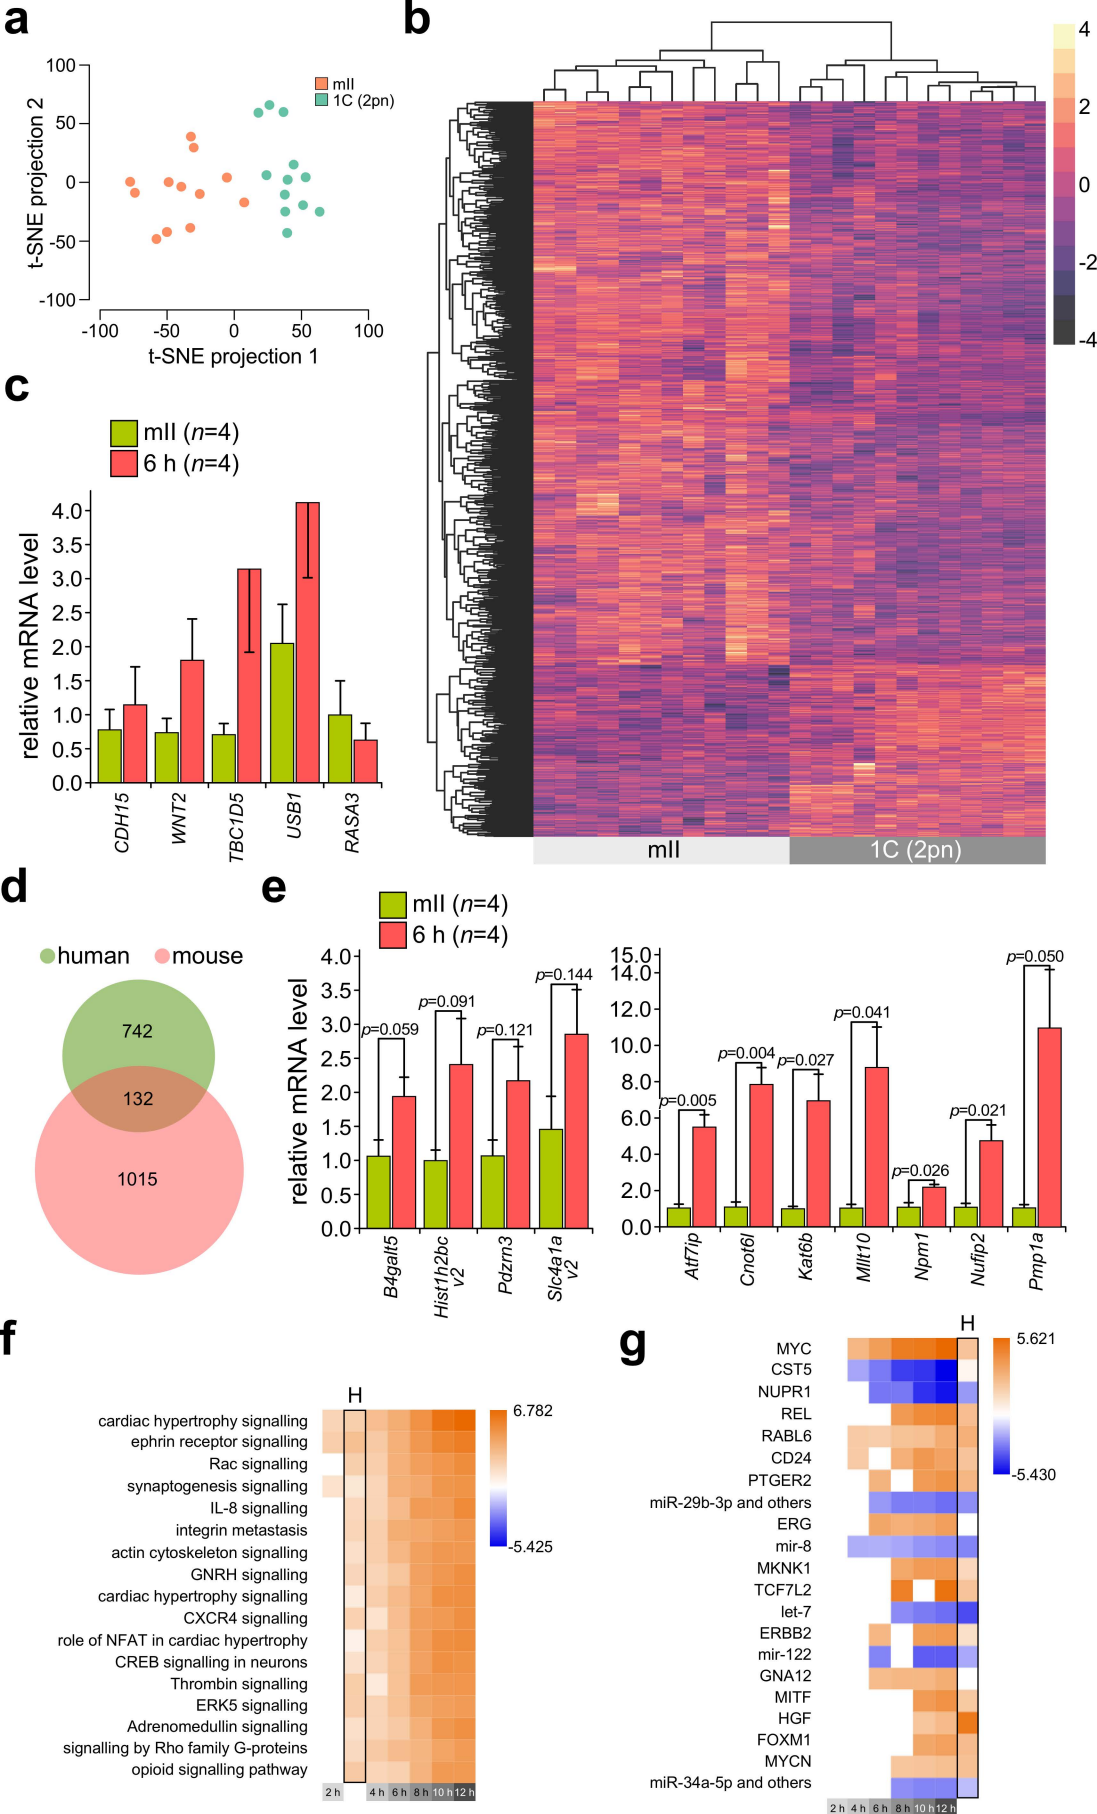

**Fig. 4**  
**Asami et al.**

## Supplementary Information

# Mouse fertilization triggers a conserved transcription program in one-cell embryos

Maki Asami, Brian Y. H. Lam, Martin Hoffmann, Toru Suzuki, Xin Lu,  
5 Matthew D. VerMilyea, Naoko Yoshida, Marcella K. Ma, Kara Rainbow,  
Stefanie Braun, Nina Patwary, Giles S. H. Yeo, Christoph A. Klein, Anthony  
C. F. Perry

### **This pdf file includes:**

- Materials and Methods
- 10 Supplementary Figure 1
- Legend for Supplementary Figure 1
- References 31 to 63

## Materials and Methods

15 **Animal care.** Experiments involving animals were performed in accordance with local and national statutes including the University of Bath Animal Welfare Ethical Review Body and complied with the UK Animals (Scientific Procedures) Act, 1986 and its embodiments. The study did not involve wild animals.

**Collection and culture of mouse oocytes.** Oocytes were from a *Mus musculus domesticus*  
20 C57BL/6 (B6) x DBA/2 F1 hybrid and *M. m. castaneus (cast)*, and embryos from B6 x DBA/2 F2 hybrids (F2), or B6 x *cast* (B6*cast*) crosses. Oviductal metaphase II (mII) oocyte complexes were typically collected in M2 medium (EMD Millipore, UK)<sup>31</sup> from 8-12-week-old C57BL/6 or B6D2F<sub>1</sub> females (produced by crossing C57BL/6 females with DBA/2 males in-house or otherwise supplied by Charles River; L'Arbresle, France) 12 to 15 h after  
25 standard superovulation by serial injection of equine and human chorionic gonadotropin (PMSG and hCG). Complexes were then either used in IVF (below), or cumulus cells were removed by hyaluronidase treatment and after multiple washing in M2 medium, denuded oocytes incubated in kalium simplex optimized medium<sup>32</sup> (KSOM; Millipore) under mineral oil in humidified 5% CO<sub>2</sub> (v/v air) at 37°C, until required<sup>33</sup>.

30 **Sperm preparation and microinjection (ICSI).** Preparation of cauda epididymidal sperm from 8- to 12-week-old *Mus musculus musculus* B6D2F<sub>1</sub> or *Mus musculus castaneus (cast)* males for ICSI was essentially as previously described<sup>33,34</sup>. Injection was completed in  $\pm \leq 2.5$  min for each timepoint. The B6*cast* series was generated by injecting *cast* sperm into C57BL/6 oocytes. To prepare sperm, they were triturated for 45 sec in nuclear isolation  
35 medium (NIM; 125 mM KCl, 2.6 mM NaCl, 7.8 mM Na<sub>2</sub>HPO<sub>4</sub>, 1.4 mM KH<sub>2</sub>PO<sub>4</sub>, 3.0 mM EDTA; pH 7.0) containing 1.0% (w/v) 3-[(3-cholamidopropyl)dimethylammonio]-1-propanesulfonate (CHAPS) at room temperature (25°C). Sperm were washed twice in NIM

and pelleted at ambient temperature; head-tail detachment was enhanced by trituration during pellet resuspension. Finally, sperm were resuspended in ice-cold NIM (~0.5 ml per  
40 epididymis equivalent) and stored at 4°C for up to 3 h until required, but typically injected immediately after preparation. This gentle protocol removes sperm membrane and other (*eg* acrosomal) components that do not enter the oocyte during fertilization; the sperm support normal, healthy full-term development<sup>17,34</sup>.

Immediately before microinjection, ~50 µl of each sperm suspension was mixed with 20  
45 µl of polyvinylpyrrolidone (PVP, average  $M_r \approx 360,000$ ; Sigma-Aldrich) solution (15% [w/v]) and sperm injected (ICSI) within ~60 min of PVP mixing into oocytes in a droplet of M2 as described<sup>33,34</sup>. After a brief recovery (~5 min), injected oocytes were transferred to KSOM under mineral oil equilibrated in humidified 5% CO<sub>2</sub> (v/v air) at 37°C and cultured until required.

50 Previous studies on early embryonic transcription in the mouse<sup>3,24,25,35-37</sup> have tended to generate embryos by natural mating following superovulation, with the timing of embryo collection relative to the time of hCG injection rather than fertilization, resulting in poor, or no developmental synchrony and the loss of critical information to variation between individual embryos. Natural mating further precludes synchronization because its precise  
55 timing is difficult to ascertain. Even were the time of coitus known, in the mouse, the duration of sperm passage through the uterotubal junction to the oviduct varies<sup>38</sup>, sperm fusion with all oocytes occurs over a period of ~2.5 h<sup>39</sup>, and oocytes remain in a fertilizable state for at least 12 h post-ovulation<sup>40,41</sup>. This contrasts with the sperm injection (ICSI) protocol used here, which can generate synchronized cohorts (~10 mII oocytes can readily be injected in 5  
60 min) of developmentally competent embryos with precision<sup>33</sup>. There are no significant developmental differences between ICSI, *in vitro* fertilization (IVF) and natural mating<sup>42</sup> and

in some cases, ICSI may even be developmentally superior<sup>43</sup>. ICSI is currently the main method of assisted human reproduction worldwide, with 66.5% of total nondonor aspiration cycles worldwide<sup>44</sup> and studies on mouse ICSI are highly relevant to clinical practice.

65 **Mouse *in vitro* fertilization (IVF).** Where appropriate, embryos were generated by standard B6D2F<sub>1</sub> × B6D2F<sub>1</sub> IVF. Sperm were collected from mature males by epididymal puncture followed by dispersal for 5 min in pre-warmed human tubal fluid (HTF; Millipore) in humidified CO<sub>2</sub> (5% [v/v] in air) at 37°C. Of the 400 µl dispersal droplet, 10 µl was transferred to a fresh fertilization dish containing 200 µl HTF and incubation continued for  
70 1 h before placing ~30 cumulus oophorous complexes freshly-isolated from superovulated 8-week-old B6D2F<sub>1</sub> females and incubating in the CO<sub>2</sub> incubator at 37°C. The resultant embryos were washed in fresh HTF and dead and clearly unfertilized oocytes removed. Embryos were then washed 5x in KSOM and incubated until required in KSOM droplets equilibrated under mineral oil in humidified 5% CO<sub>2</sub> (v/v air) at 37°C.

75 **Mouse embryo culture.** Embryos were typically cultured in KSOM droplets equilibrated under mineral oil in humidified 5% CO<sub>2</sub> (v/v air) at 37°C as previously described<sup>10,33,41,48-52,56</sup>. To inhibit the transactivation of c-Myc target gene expression, embryos produced by IVF 2 h after sperm-oocyte mixing, were washed and transferred to KSOM supplemented with the inhibitor, 5-[(4-Ethylphenyl)methylene]-2-thioxo-4-thiazolidinone (10058-F4; Sigma-Aldrich) and incubation continued. Dimethylsulphoxide (DMSO) was used to  
80 solubilize 10058-F4 (with 10058-F4 at working concentrations of 1.0 to 3.0 µM) and was included in media without 10058-F4 for negative controls.

**Human metaphase II oocytes and zygotes (one-cell embryos).** Patients underwent ovarian stimulation according to guidelines of each clinic, where protocols included agonist luteal  
85 phase and antagonist suppression. On the day of mII oocyte retrieval (day 0), oocytes were

either cryopreserved by a slow freeze method using propanediol (PROH)<sup>45</sup> or used to produce embryos by *in vitro* fertilization or ICSI. Immediately after fertilization assessment, morphologically normal bipronuclear (2pn) zygotes were cryopreserved using dimethylsulfoxide<sup>46</sup> and stored under liquid nitrogen as appropriate. Some sibling embryos  
90 gave rise to children, further attesting to their healthy status. When required, cryopreserved oocytes and zygotes were thawed by rapid warming using a Vit-Warm Kit (FUJI Irvine Scientific, USA) according to the recommended protocol, and viability confirmed. All mII oocytes and zygotes were washed in protein-free multi-purpose handling medium (FUJI Irvine Scientific, USA) and each placed in a 0.8 ml PCR tube containing 1x single-cell lysis  
95 buffer supplemented with RNase inhibitor (Takara Clontech, USA). Oocyte and one-cell embryo donor groups did not overlap; mII oocytes and zygotes came from different individuals. There were six mII oocyte donors (aged 23, 24, 24, 25, 27 and 31 years); five were Caucasian and one African American/Hispanic. There were four zygote donor couples; for two the male and female ages were respectively 36 and 38 and 40 and 50 (data are  
100 unavailable for the other two couples) and three of the couples were Caucasian, with one Asian couple.

**Immunocytochemistry.** Oocytes, embryos and cultured cells were fixed in 4% (w/v) paraformaldehyde and either processed immediately or stored at 4°C for up to 2 weeks until required. Fixed cells were permeabilized by incubation in PBS supplemented with 0.5% (v/v)  
105 triton X-100 and 0.1% (w/v) BSA for 30 min at 37°C, followed by blocking in PBS supplemented with 3% (v/v) normal goat serum and 0.1% (w/v) BSA for 30 min at room temperature. Labeling was by incubating samples overnight at 4°C in primary antibody followed by a incubation for 1 h at 37°C with the appropriate secondary antibody (1:250 [v/v]; Life Technologies Ltd., UK) conjugated to Alexa 488, Alexa 594 and Alexa 647. DNA was

110 stained by incubating samples at 37°C for 20 min in propidium iodide (1:200 [v/v]; Sigma,  
USA) or Hoechst 33342 (1:1000 [v/v]; Sigma). Chromatin epitopes in mII oocytes and  
embryos are accessible to their cognate antibodies<sup>10</sup> and most (27/34) here resided on solvent-  
exposed N-terminal histone tails<sup>47</sup>, although in 28/34 cases (82.3%), samples contained in-  
built positive controls in which one or both parental chromatin sets stained within a single  
115 given cell. Only one situation corresponded to an epitope (the core modification, H4K91ac)  
that was unrecognised in both parental alleles at mII, and both in one-cell embryos.  
Antibodies with no reactivity in either mII oocytes or embryos were excluded from the  
analysis.

**Direct fluorescence imaging and analysis.** Differential interference contrast microscopy  
120 (DIC) and epifluorescence imaging have been described previously (41, 48-50). Images of  
live oocytes or embryos following cRNA injection were captured on an Olympus IX71  
equipped with an Andro Zyla sCMOS camera and OptoLED illumination system (Cairn  
Research Ltd., UK) and processed using Metamorph software (Molecular Devices, LLC,  
USA). Excitation at 587 nm in combination with an ET-mCherry filter system was used for  
125 mCherry fluorescence detection and at 484 nm with an ET-EYFP filter system to detect Venus  
epifluorescence. Confocal images were obtained using LaserSharp 2000 6.0 Build 846  
software on an Eclipse E600 (Nikon, Japan) microscope equipped with a Radiance 2100 laser  
scanning system (BioRad, USA; LSM Technical Service, UK). Image J  
(<http://rsbweb.nih.gov/ij>) was used in image data analysis. The parental provenance of  
130 pronuclei in mouse one-cell embryos was assigned according to size and position; the female  
pronucleus is consistently smaller and closer to the second polar body than the paternal  
pronucleus.

**Preparation and injection of cRNA.** 5'-capped cRNA was synthesized *in vitro* from

linearized plasmid template DNA in a T7 mScript™ Standard mRNA Production System  
135 (Cellsript, USA) according to the recommendations of the manufacturer, as previously  
described<sup>48,51,52</sup>. Where appropriate, the polyadenylation step following synthesis was  
omitted (Fig. 2h). cRNA was dissolved in nuclease-free water, quantified on a  
Nanophotometer and stored in aliquots at -80°C until required. cRNA solutions were diluted  
as appropriate with sterile water and injected (typically at concentrations of 0.01 to 1 µg/µl)  
140 within 1 h of thawing *via* a piezo-actuated micropipette into mII oocytes or embryos in M2  
medium.

**Ratiometric PCR (qPCR).** For ratiometric transcript quantification by PCR (qPCR),  
embryos were produced either by IVF or ICSI and incubated in humidified 5% CO<sub>2</sub> (v/v air)  
at 37°C until required. At the appropriate time post-injection, embryos were examined to  
145 confirm morphology (*eg* the presence of a second polar body and two pronuclei), transferred  
to 200 µl Isogen (Nippon Gene, Japan) containing 10 ng tRNA (Hoffmann-La Roche Ltd.,  
Basel, Ch) and either used directly or flash-frozen in liquid nitrogen and stored at -80°C until  
required. Synthesis of cDNA from total RNA was primed with random 8-mers plus  
oligo(dT)<sub>20</sub> (each at 30 µM) in a 21 µl reaction volume containing 200 U SuperScript III  
150 reverse transcriptase (Invitrogen). For other qPCR, total RNA was extracted by transferring  
5~10 oocytes or embryos in a minimal volume (<0.5 µl) into 1 µl 0.1% (w/v) Sarkosyl  
(Teknova, Hollister, CA) containing 10 ng tRNA (Hoffmann-La Roche Ltd., Basel, Ch),  
heated at 65°C for 5 min and used to program cDNA synthesis primed with random 6- or 8-  
mers, with or without oligo(dT)<sub>20</sub> (each at 30 µM) in a 21 µl reaction volume containing 200  
155 U SuperScript IV reverse transcriptase (Thermo Fisher Scientific, UK). qPCR reactions were  
performed in a QuantStudio 7 (Thermo Fisher Scientific, UK) or ABI 7500 Real Time PCR  
System (Applied Biosystems, CA) in reactions (20 µl) containing 1-2 µl template cDNA,



forward and reverse primers (100 nM each) and 12.5  $\mu$ l of Power SYBR (ABI), using the parameters: 10 min at 95°C, followed by up to 45 cycles of (15 sec at 95°C, 1 min at 58°C and 35 sec at 72°C). Each experiment was performed with biological triplicates collected on at least two days and included technical duplicates of each sample. Primer sets (Hokkaido System Science, Japan or Eurofins MWG Operon, Germany) were non-dimerizing under the conditions employed. Reactions lacking input cDNA were used to verify absence of contamination in cocktail components. Steady state transcript levels were normalized with respect to the internal reference, *H3f3a* based on work by ourselves and others showing that *H3f3a* is robustly expressed in mouse oocytes and preimplantation embryo<sup>41,48,53-56</sup>. The CT value for *H3f3a* corrected for cell number (CT+log<sub>2</sub> embryo cell number) is constant during preimplantation stages, giving a mean value of 29.56±0.23 (for 25≤*n*≤29 independent replicates). Statistical differences between pairs of data sets were analyzed by a two-tailed unpaired *t*-test and *p*-values ≤0.05 considered statistically significant unless stated otherwise.

**Microarray analysis.** For time-course transcriptomic microarray analysis, oocyte and embryo transcriptomes were prepared as for RNA-seq and preparation and whole transcriptome amplification fidelity assessed as previously described<sup>48,56-58</sup>. Gene expression data were quality-assessed by inspection of chip raw images and gene expression frequency distributions. Only high quality data were approved for further bioinformatic analysis producing 51 samples. Raw gene expression data were background-corrected (limma R-package, normexp method)<sup>59</sup> normalized by quantile normalization. Technically replicated probes (identical Agilent IDs) were replaced by their median per sample. The original standard deviation was 2.07. Technically replicated probes (identical Agilent IDs) were replaced by their median per sample. For clustering and functional annotation, probes

targeting the same gene were disambiguated by retaining only the probe with the lowest  $p$ -value. This reduced the 41,000 non-control probes to 29,078, of which 21,391 were annotated by proper gene symbols. The number of exons was retrieved from UCSC known genes (mm9) by matching Agilent probe sequence locations to UCSC transcript coordinates. If different transcripts for the same probe sequence were available the number of exons was averaged across these transcripts.

**Mouse single-cell RNA sequencing.** Single-cell oocytes and embryos 2, 4, 6, 8, 10 and 12 h post-ICSI were lysed in 1x single-cell lysis buffer containing RNase inhibitor (Takara Clontech, USA). RNA from lysates was subjected to direct reverse transcription with template-switching oligo and random hexamers, followed by PCR amplification, Illumina sequencing library generation and ribosomal RNA removal (all using Clontech SMARTer Total RNA-Seq Kit Pico Input V1). The libraries were then combined at equal molar concentrations and sequenced both ends for 100 base pairs (PE100) on an Illumina HiSeq 4000 instrument.

**Human single-cell RNA sequencing.** The protocol we used was similar to the one for mouse single-cell RNA sequencing. Human mII oocytes and embryos were lysed using 1x single-cell lysis buffer containing RNase inhibitor. Lysates were then used to generate RNA sequencing libraries using Clontech SMARTer Total RNA-Seq Kit Pico Input (V2), which were sequenced from both ends for 100bp (PE100) using an Illumina HiSeq 4000 instrument.

**Sequencing bioinformatics.** Raw sequence reads (fastq) from mouse oocytes and embryos were trimmed using the `fastx_trimmer` command from `fastx-Toolkit` (version 0.0.13; respectively 4 nt from 5' and 15 nt from 3' ends), and sequencing adapter sequences were removed by `Cutadapt` (1.7.1). Mapping of the trimmed reads was by `Tophat` (2.0.11) using the GRCm38 genome and Ensembl 54 reference transcriptome. After sequence alignment, the transcriptome was remodelled *via de novo* re-assembly of transcripts based on empirical

data from mapped reads and incorporation into the original reference (Cufflinks 2.2.1). Gene-level counts based on the updated transcriptome were then performed using ht-seq-count (0.6.1p1) and transcript level counts *via* cuffnorm command from Cufflinks (2.2.1).

For the parent-of-origin study, gffread utility from Tophat (2.0.11) was used to generate  
210 the reference fasta for the transcriptomes of C57/BL6 and Cast/EiJ based on their corresponding reference genomes (GRCm38, Ensembl 70) and remodelled transcriptome data as described above. The transcriptomes were merged to form a single 'F1' reference transcriptome for mapping of trimmed sequence reads using Bowtie 1.1.0. Mapped reads were subsequently analysed using MMSEQ 1.0.9 to estimate the transcript level and  
215 aggregated gene level abundance originating from the genome of each strain. Abundance tables were generated using mmseq.R R script accompanied by the MMSEQ package for downstream analyses.

Merged F2 and B6*cast* RNA-seq series ( $n=52$  samples,  $6 \leq n \leq 9$  per time-point; median 29 million reads per sample) detected 11,840 unique genes with  $>1$  count per million reads.

220 For human sequencing data, reads were mapped onto the Human GRCh38 genome and Ensembl 92 transcriptome using STAR (2.5.0a). Post-alignment reads were then fed into Stringtie (1.3.6) to remodel the transcriptome to assemble and incorporate novel transcripts, analogous to mouse RNA-seq analysis. The gene-level count was performed using htseq-count 0.6.1p1 and the transcriptome remodelled using Stringtie for downstream differential  
225 expression analysis. This analysis yielded a median of 67 million reads per sample.

**Differential expression and pathway analysis.** Raw gene-level counts were analysed using edgeR. A generalised linear model (GLM) was applied to determine dispersion, and likelihood-ratio test was used to detect differential gene expression over the time-course. For estimated counts downstream of Cufflinks and MMSEQ, data was normalised and mean

230 variance relationships determined using limma-voom, followed by empirical Bayesian  
moderated F-statistic or *t*-test (eBayes) as appropriate. For the microarray dataset, raw gene  
expression values were background-corrected and normalized by quantile normalization  
using the Limma R package. As with RNA sequencing analysis, a GLM was fitted and eBayes  
used to detect differential gene expression over the time series. Pathway and upstream  
235 regulator analysis were performed using Qiagen Ingenuity Pathway Analysis software.

**Sperm H3K4me3 ChIP-seq analysis.** A sperm H3K4me3 ChIP-seq dataset was  
downloaded from Gene Expression Omnibus (Accession GSE42629; [Ref. 21]). Raw fastq  
reads for H3K4me3-bound DNA (GSM1046833, ChIP) and sonicated genomic DNA from  
sperm (GSM1046836, input control) were aligned to the mouse GRCm38 genome using  
240 BWA MEM (v0.7.12). Mapped reads were sorted by their genomic coordinates and used as  
input for peak detection using MACS2 (Ref. 60), which performed PCR de-duplication,  
library normalization, ChIP peak modelling and calling by comparing reads from the  
H3K4me3 bound library to background controls (sperm genomic DNA). FDR<0.05 and peak  
fold-enrichment >5 were used to filter peak calls (total 44,209 peaks spanning a total of 62  
245 Mb, or ~1.78% of the genome). Filtered peaks were annotated using ChIPSeeker R package  
with Ensembl mouse reference gene model GTF version 100. Of the peaks, 28,190 (63.8%)  
were labelled within the promotor ( $\pm 3$  kb from the transcriptional start site [TSS]) and 5'  
untranslated regions (UTRs). Only peaks within the proximal promotor region (*ie* 1.5 kb  
upstream or downstream of the TSS) were used for downstream comparisons.

250 **Data availability.** Source Data are provided for figures. Microarray and RNA-seq data have  
been deposited into Gene Expression Omnibus (GEO).

**Statistics and reproducibility.** Statistical differences between pairs of data sets were  
analysed by two-tailed unpaired *t*-tests. Values of  $p < 0.05$  were considered statistically

significant unless stated otherwise.

255 **References**

31. Quinn, P., Barros, C. and Whittingham, D. G. (1982). Preservation of hamster oocytes to assay the fertilizing capacity of human spermatozoa. *J. Reprod. Fertil.* **66**, 161-168.
32. Erbach, G.T., Lawitts, J.A., Papaioannou, V.E. and Biggers, J.D. (1994). Differential growth of the mouse preimplantation embryo in chemically defined media. *Biol. Reprod.* **50**, 1027-1033.
- 260 33. Yoshida, N. and Perry, A.C.F. (2007). Piezo-actuated mouse intracytoplasmic sperm injection (ICSI). *Nature Protoc.* **2**, 296-304.
34. Perry, A.C.F., Wakayama, T., Kishikawa, H., Kasai, T., Okabe, M., Toyoda, Y. and Yanagimachi, R. (1999). Mammalian transgenesis by intracytoplasmic sperm injection. *Science* **284**, 1180-1183.
35. Bouniol, C., Nguyen, E. and Debey, P. (1995). Endogenous transcription occurs at the 1-cell stage in  
265 the mouse embryo. *Exp. Cell Res.* **218**, 57-62.
36. Wang, Q.T., Piotrowska, K., Ciemerych, M.A., Milenkovic, L., Scott, M.P., Davis, R.W. and Zernicka-Goetz, M. (2004). A genome-wide study of gene activity reveals developmental signaling pathways in the preimplantation mouse embryo. *Dev. Cell* **6**, 133-44.
37. Zeng, F., Baldwin, D.A. and Schultz, R.M. (2004). Transcript profiling during preimplantation mouse  
270 development. *Dev. Biol.* **272**, 483-496 (2004).
38. Suarez, S.S. (1987). Sperm transport and motility in the mouse oviduct: observations *in situ*. *Biol. Reprod.* **36**, 203-210.
39. Stefanini, M., Oura, C. and Zamboni, L. (1969). Ultrastructure of fertilization in the mouse 2. Penetration of sperm into the ovum. *J. Submicr. Cytol.* **1**, 1-23.
- 275 40. Marston, J.H. and Chang, M.C. (1964). The fertilizable life of ova and their morphology following delayed insemination in mature and immature mice. *J. Exp. Zool.* **155**, 237-251.
41. Suzuki, T., Suzuki, E., Yoshida, N., Kubo, A., Li, H., Okuda, E., Amanai, M. and Perry, A.C.F. (2010). Mouse Emi2 as a distinctive regulatory hub in second meiotic metaphase. *Development* **137**, 3281-3291.
42. Wilson, T.J., Lacham-Kaplan, O., Gould, J., Holloway, A., Bertonecello, I., Hertzog, P.J. and Trounson, A.  
280 (2007). Comparison of mice born after intracytoplasmic sperm injection with *in vitro* fertilization and natural mating. *Mol. Reprod. Dev.* **74**, 512-519.

43. Szczygiel, M.A., Kusakabe, H., Yanagimachi, R. and Whittingham, D.G. (2002). Intracytoplasmic sperm injection is more efficient than *in vitro* fertilization for generating mouse embryos from cryopreserved spermatozoa. *Biol. Reprod.* **67**, 1278-1284.
- 285 44. Adamson, G.D., de Mouzon, J., Chambers, G.M., Zegers-Hochschild, F., Mansour, R., Ishihara, O., Banker, M. and Dyer, S. (2018). International Committee for Monitoring Assisted Reproductive Technology: world report on assisted reproductive technology, 2011. *Fertil. Steril.* **110**, 1067-1080.
45. Gook, D.A., Osborn, S.M. and Johnston, W.I. (1993). Cryopreservation of mouse and human oocytes using 1,2-propanediol and the configuration of the meiotic spindle. *Hum. Reprod.* **8**, 1101-1109.
- 290 46. Camus, M., Van den Abbeel, E., Van Waesberghe, L., Wisanto, A., Devroey, P. and Van Steirteghem, A.C. (1989). Human embryo viability after freezing with dimethylsulfoxide as a cryoprotectant. *Fertil. Steril.* **51**, 460-465.
47. Cheung, P., Allis, C.D. and Sassone-Corsi, P. (2000). Signaling to chromatin through histone modifications. *Cell* **103**, 263-271.
- 295 48. Suzuki, T., Asami, M., Hoffmann, M., Lu, X., Gužvić, M., Klein, C.A. and Perry, A.C.F. (2016). Mice produced by mitotic reprogramming of sperm injected into haploid parthenogenotes. *Nature Comm.* **7**, 12676.
49. Duch, M., Torras, N., Asami, M., Suzuki, T., Arjona, M.I., Gómez-Martínez, R., VerMilyea, M.D., Castilla, R., Plaza, J.A. and Perry, A.C.F. (2020). Tracking intracellular forces and mechanical property changes in  
300 mouse one-cell embryo development. *Nat. Materials* May 25. doi: 10.1038/s41563-020-0685-9.
50. Suzuki, T., Yoshida, N., Suzuki, E., Okuda, E. and Perry, A.C.F. (2010). Full-term mouse development by abolishing Zn<sup>2+</sup>-dependent metaphase II arrest without Ca<sup>2+</sup> release. *Development* **137**, 2659-2669.
51. Suzuki, T., Asami, M., Patel, S.G., Luk, L.Y.P., Tsai, Y.H. and Perry, A.C.F. (2018). Switchable genome editing *via* genetic code expansion. *Sci. Rep.* **8**, 10051.
- 305 52. Suzuki, T., Asami, M. and Perry, A.C.F. (2014). Asymmetric parental genome engineering by Cas9 during mouse meiotic exit. *Sci. Rep.* **4**, 7621.
53. Mann, W. and Haaf, T. (2010). Single cell RT-PCR on mouse embryos: a general approach for developmental biology. *Methods Mol. Biol.* **630**, 3-12.

54. May, A., Kirchner, R., Müller, H., Hartmann, P., El Hajj, N., Tresch, A., Zechner, U., Mann, W. and Haaf,  
310 T. (2009). Multiplex RT-PCR expression analysis of developmentally important genes in individual mouse  
preimplantation embryos and blastomeres. *Biol Reprod* **80**, 194-202.
55. Torres-Padilla, M.E., Bannister, A.J., Hurd, P.J., Kouzarides, T. and Zernicka-Goetz, M. (2006). Dynamic  
distribution of the replacement histone variant H3.3 in the mouse oocyte and preimplantation embryos. *Int.  
J. Dev. Biol.* **50**, 455-461.
- 315 56. VerMilyea, M.D., Maneck, M., Yoshida, N., Blochberger, I., Suzuki, E., Suzuki, T., Spang, R., Klein, C.A.  
and Perry, A.C.F. (2011). Transcriptome asymmetry within mouse zygotes but not between early  
embryonic sister blastomeres. *EMBO J.* **30**, 1841-1851.
57. Hartmann, C.H. and Klein, C.A. (2006). Gene expression profiling of single cells on large-scale  
oligonucleotide arrays. *Nucleic Acids Res* **34**, e143.
- 320 58. Hosseini, H., Obradović, M.M., Hoffmann, M., Harper, K.L., Sosa, M.S., Werner-Klein, M., Nanduri, L.K.,  
Werno, C., Ehrl, C., Maneck, M., Patwary, N., Haunschild, G., Gužvić, M., Reimelt, C., Grauvogl, M.,  
Eichner, N., Weber, F., Hartkopf, A.D., Taran, F.A., Brucker, S.Y., Fehm, T., Rack, B., Buchholz, S.,  
Spang, R., Meister, G., Aguirre-Ghiso, J.A. and Klein, C.A. (2016). Early dissemination seeds metastasis  
in breast cancer. *Nature* **540**, 552-558.
- 325 59. Smyth, G.K. (2004). Linear models and empirical bayes methods for assessing differential expression in  
microarray experiments. *Stat. Appl. Genet. Mol. Biol.* **3**, Article 3.
60. Zhang, Y., Liu, T., Meyer, C.A., Eeckhoute, J., Johnson, D.S., Bernstein, B.E., Nusbaum, C., Myers, R.M.,  
Brown, M., Li, W. and Liu, X.S. (2008). Model-based analysis of ChIP-Seq (MACS). *Genome Biol.* **9**,  
R137.
- 330 61. Park, S.J., Komata, M., Inoue, F., Yamada, K., Nakai, K., Ohsugi, M. and Shirahige, K. (2013). Inferring  
the choreography of parental genomes during fertilization from ultralarge-scale whole-transcriptome  
analysis. *Genes Dev.* **27**, 2736-2748.
62. Bartolomei, M.S. and Corden, J.L. (1987). Localization of an alpha-amanitin resistance mutation in the  
gene encoding the largest subunit of mouse RNA polymerase II. *Mol. Cell Biol.* **7**, 586-594.
- 335 63. Becker, S., Kiecke, C., Schäfer, E., Sinzig, U., Deuper, L., Trigo-Mourino, P., Griesinger, C., Koch, R.,



Rydzynska, Z., Chapuy, B., von Bonin, F., Kube, D., Venkataramani, V., Bohnenberger, H., Leha, A., Flach, J., Dierks, S., Bastians, H., Maruschak, B., Bojarczuk, K., Taveira, M.O., Trümper, L., Wulf, G.M. and Wulf, G.G. (2020). Destruction of a Microtubule-Bound MYC Reservoir during Mitosis Contributes to Vincristine's Anticancer Activity. *Mol. Cancer Res.* **18**, 859-872.

## Supplementary figure legend

**Supplementary Figure 1. Transcript level overlaps with published data.** **a**, Heatmap showing the overlap between transcripts exhibiting expression changes across the F2-B6*cast* 12 h time-course (FDR  $p$ -value  $<0.05$ ) and previously-reported maternal genes<sup>61</sup>. Most genes  
345 map to early time-points, consistent with rapid transcript degradation. **b**, Heatmap as per (**a**), but showing the overlap with minor EGA genes as previously defined<sup>61</sup>. **c**, Heatmap as per (**b**), but showing the overlap with major EGA genes as previously defined<sup>61</sup>. **d**, Venn diagram showing numbers of overlapping genes whose transcript levels change throughout the time-course (deg) or were previously reported in one-cell (1C) or two-cell (2C) embryos  
350 (published)<sup>61</sup>.

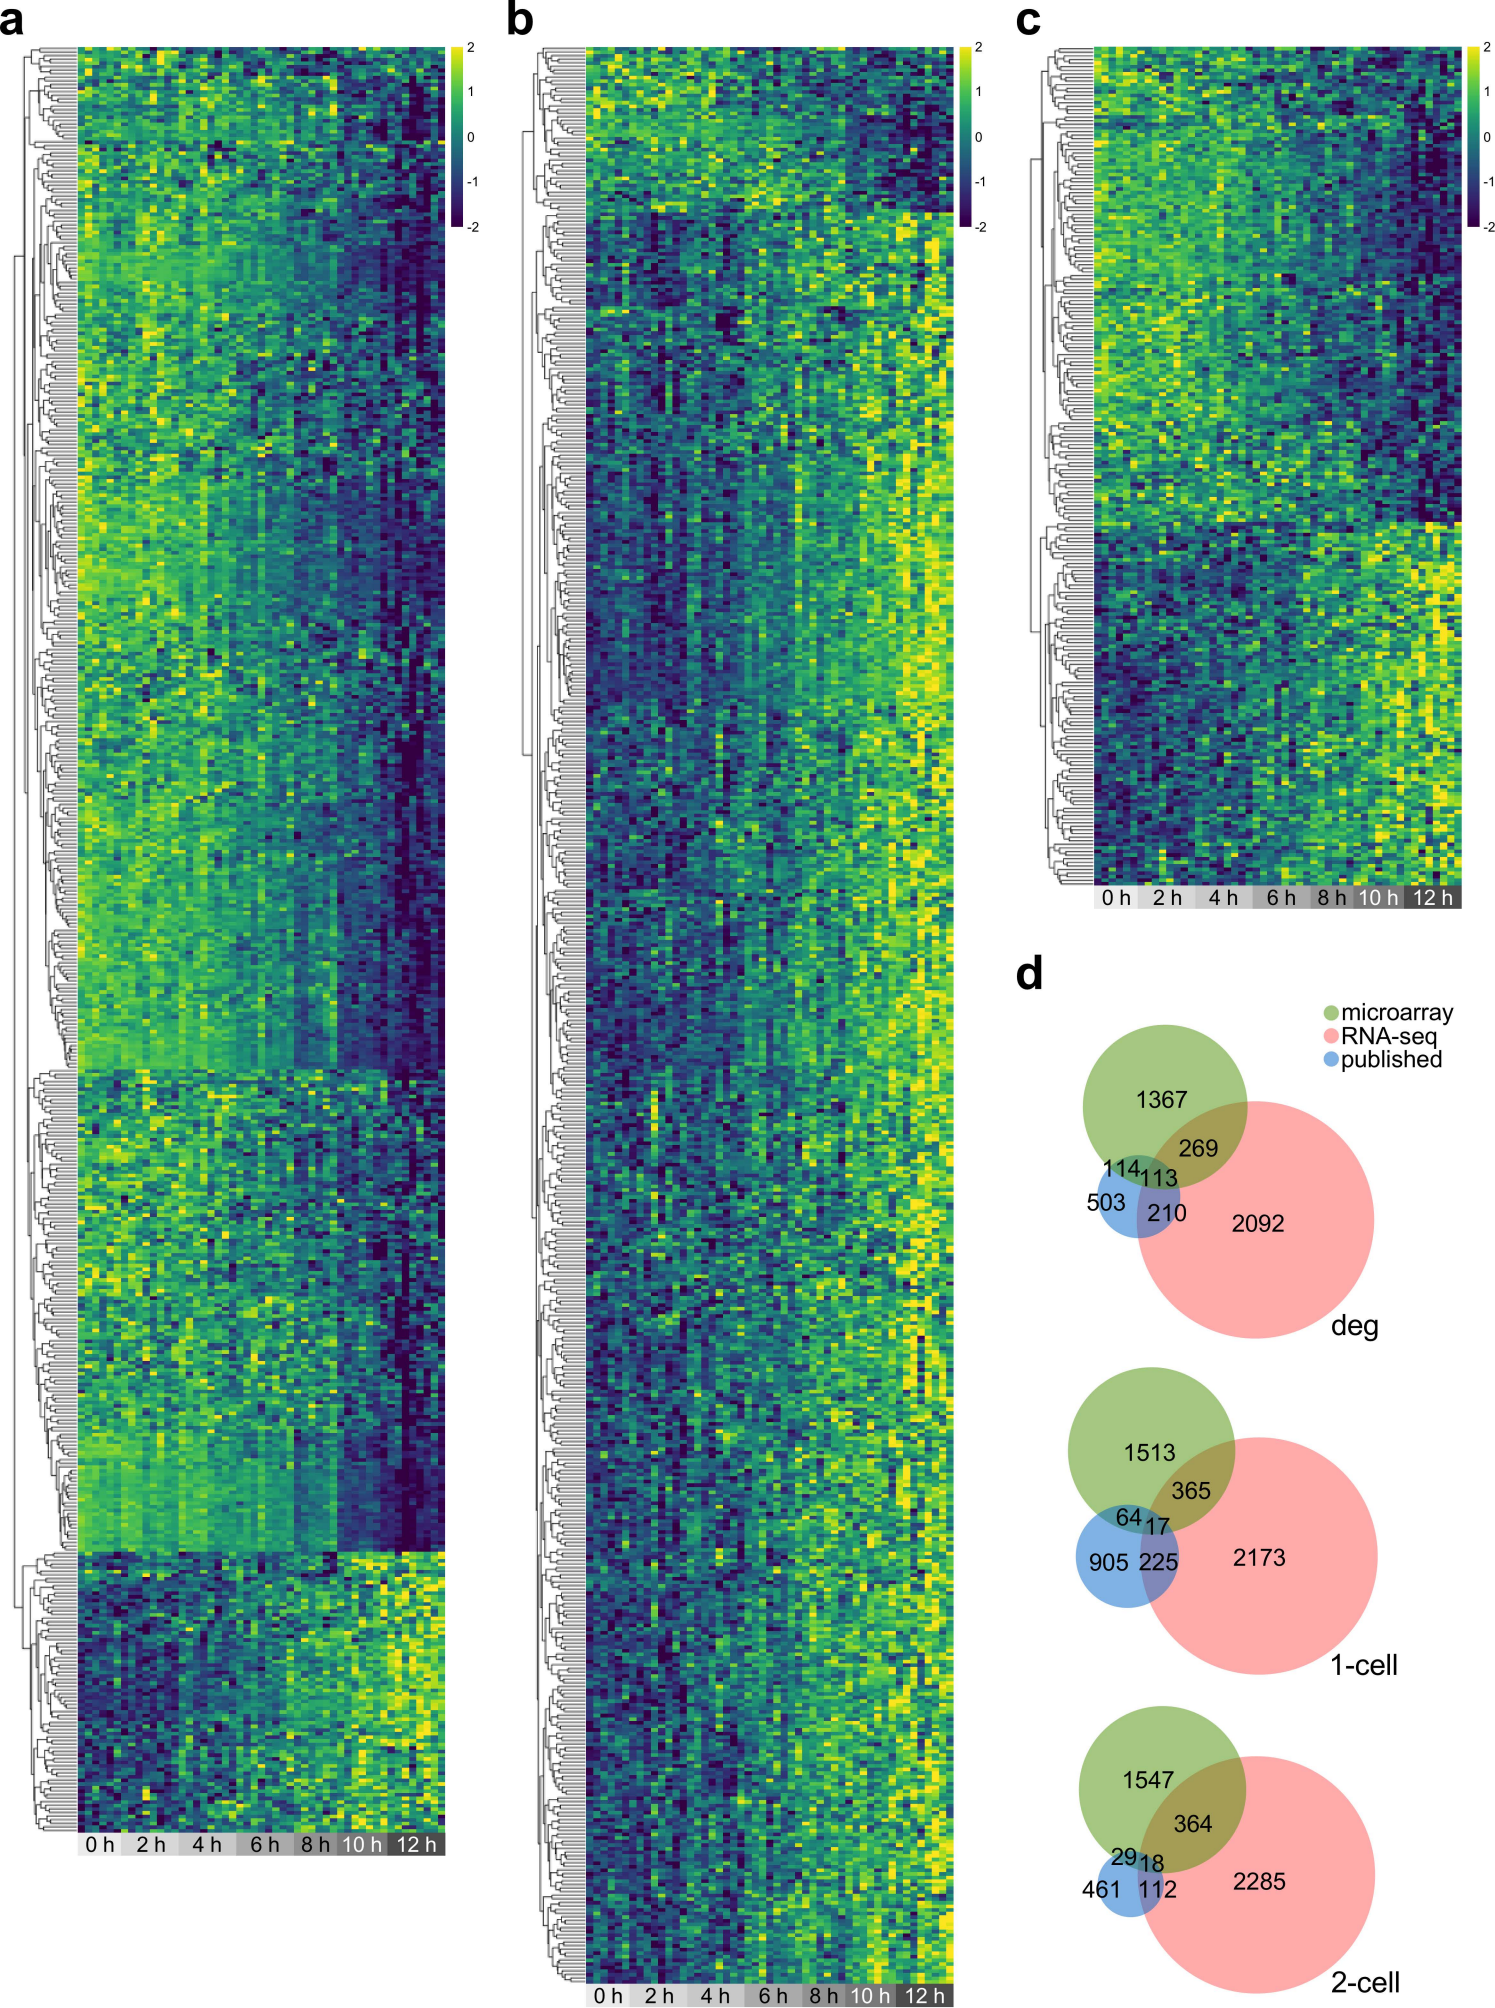

**Supplementary Figure 1**  
**Asami et al.**
